# Supplementary material
Source: PubMed Central journal article supplement (PMC10760404)
Supplement: NIHMS1688779-supplement-Supplementary_Figures.pdf [file NIHMS1688779-supplement-Supplementary_Figures.pdf]

## Supplementary Figure S1

A.

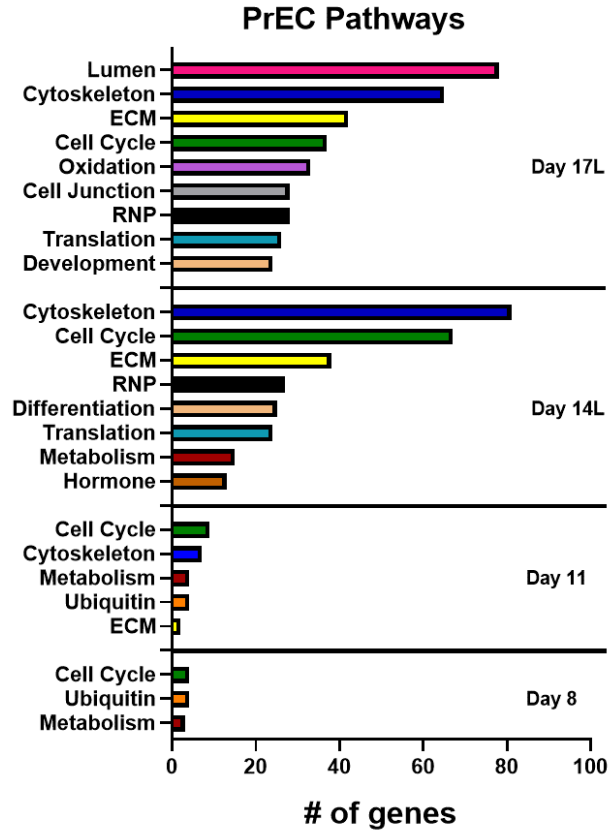

B.

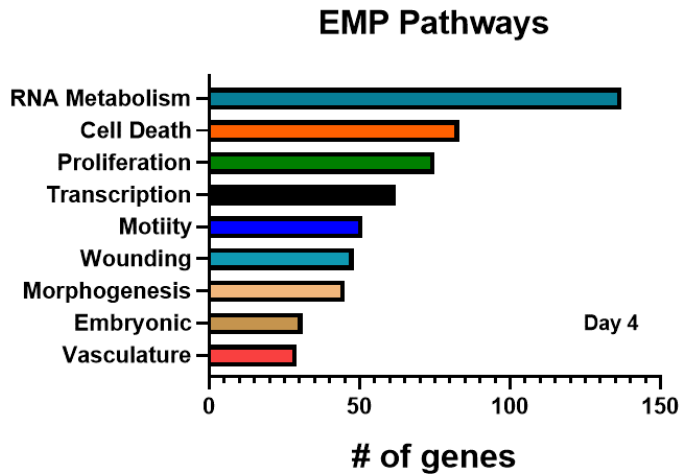

**Supplementary Figure S1: A)** Pathway enrichment analysis was conducted on the significantly differentially expressed genes from normal PrECs over a time course of luminal cell differentiation. At Days 14 and 17, only the luminal population (L) was assessed. **B)** Pathway enrichment analysis was conducted on the significantly differentially expressed genes in tumorigenic EMP cells compared to normal PrECs.

## Supplementary Figure S2

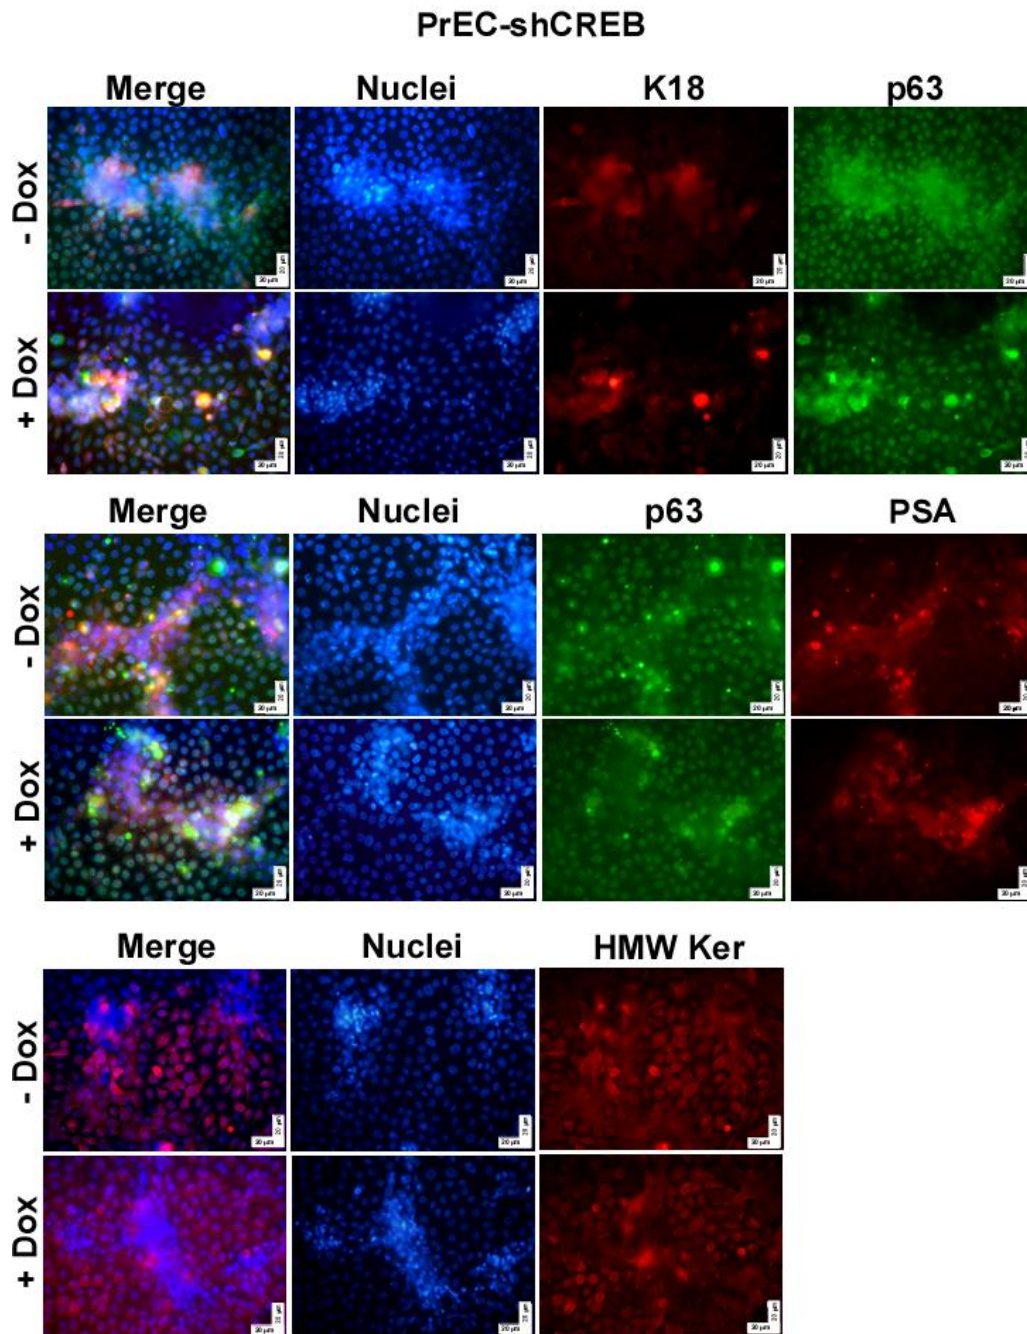

**Supplementary Figure S2:** PrEC-TetON-shCREB1 cells induced to differentiate for 12 days in the absence (-Dox) or presence (+Dox) of 25ng/ml doxycycline. Cultures immunostained for luminal markers K18 or PSA, basal markers p63 or HMW keratin (K5/K14), DNA counterstained with Hoescht, and imaged by fluorescence microscopy.

## Supplementary Figure S3

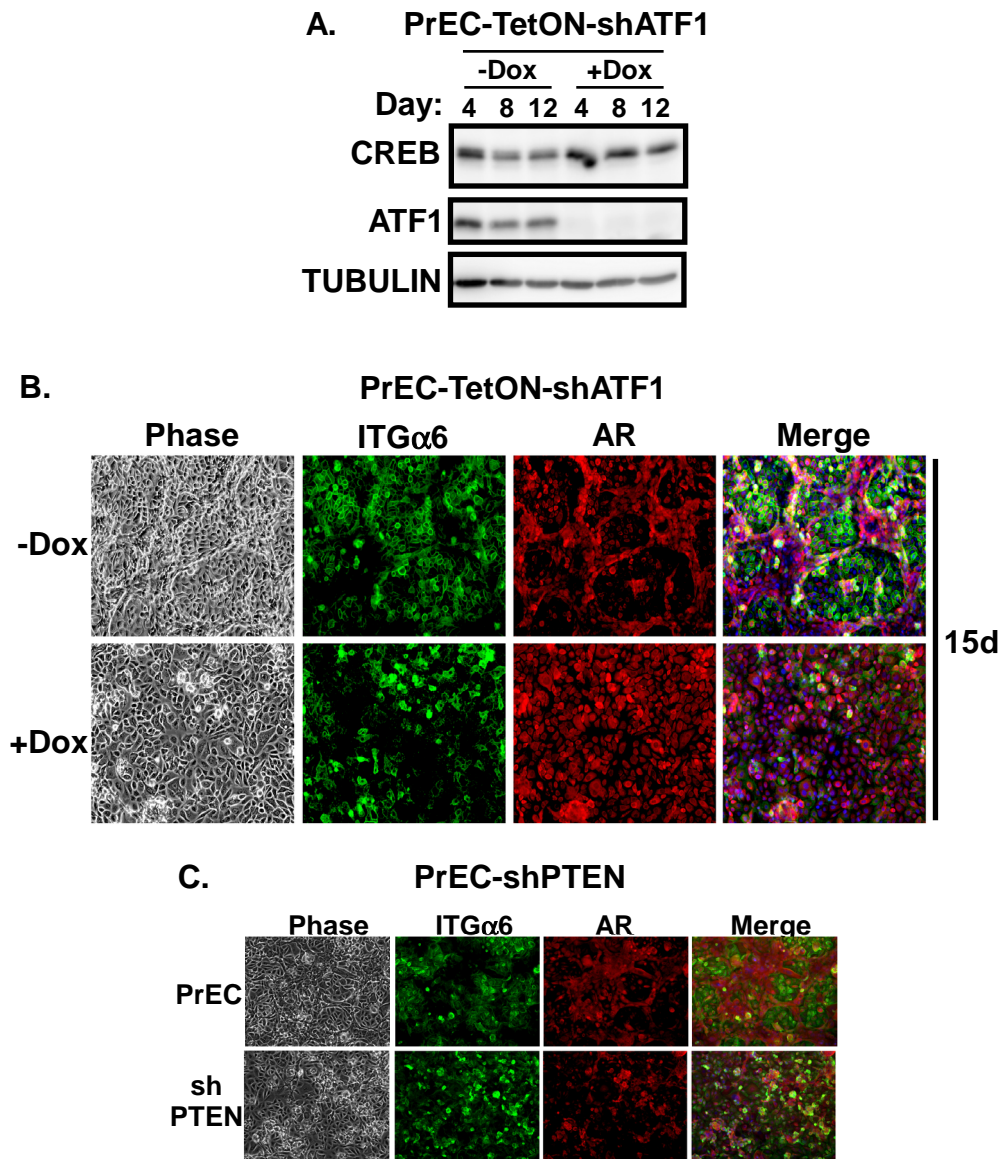

**Supplementary Figure S3: ATF1 and PTEN are required for luminal cell differentiation. A)** ATF1 knock-down in differentiating PrEC-TetON-shATF1 cells treated with (+Dox) or without (-Dox) 100ng/ml doxycycline measured by immunoblotting. **B)** PrEC-TetON-shATF1 cells were differentiated for 15 days with (+Dox) or without (-Dox) 100ng/ml doxycycline. Cultures were immunostained for integrin  $\alpha$ 6 (ITG $\alpha$ 6, basal marker), AR (luminal marker), counterstained with Hoescht (Merge), and imaged by phase or fluorescence microscopy. **C)** PrEC or PrEC-shPTEN cells were differentiated for 12 days. Cultures were immunostained for integrin  $\alpha$ 6 (ITG $\alpha$ 6, basal marker), AR (luminal marker), counterstained with Hoescht (Merge), and imaged by phase or fluorescence microscopy.



## Supplementary Figure S4

### EMP-TetON-shCREB1

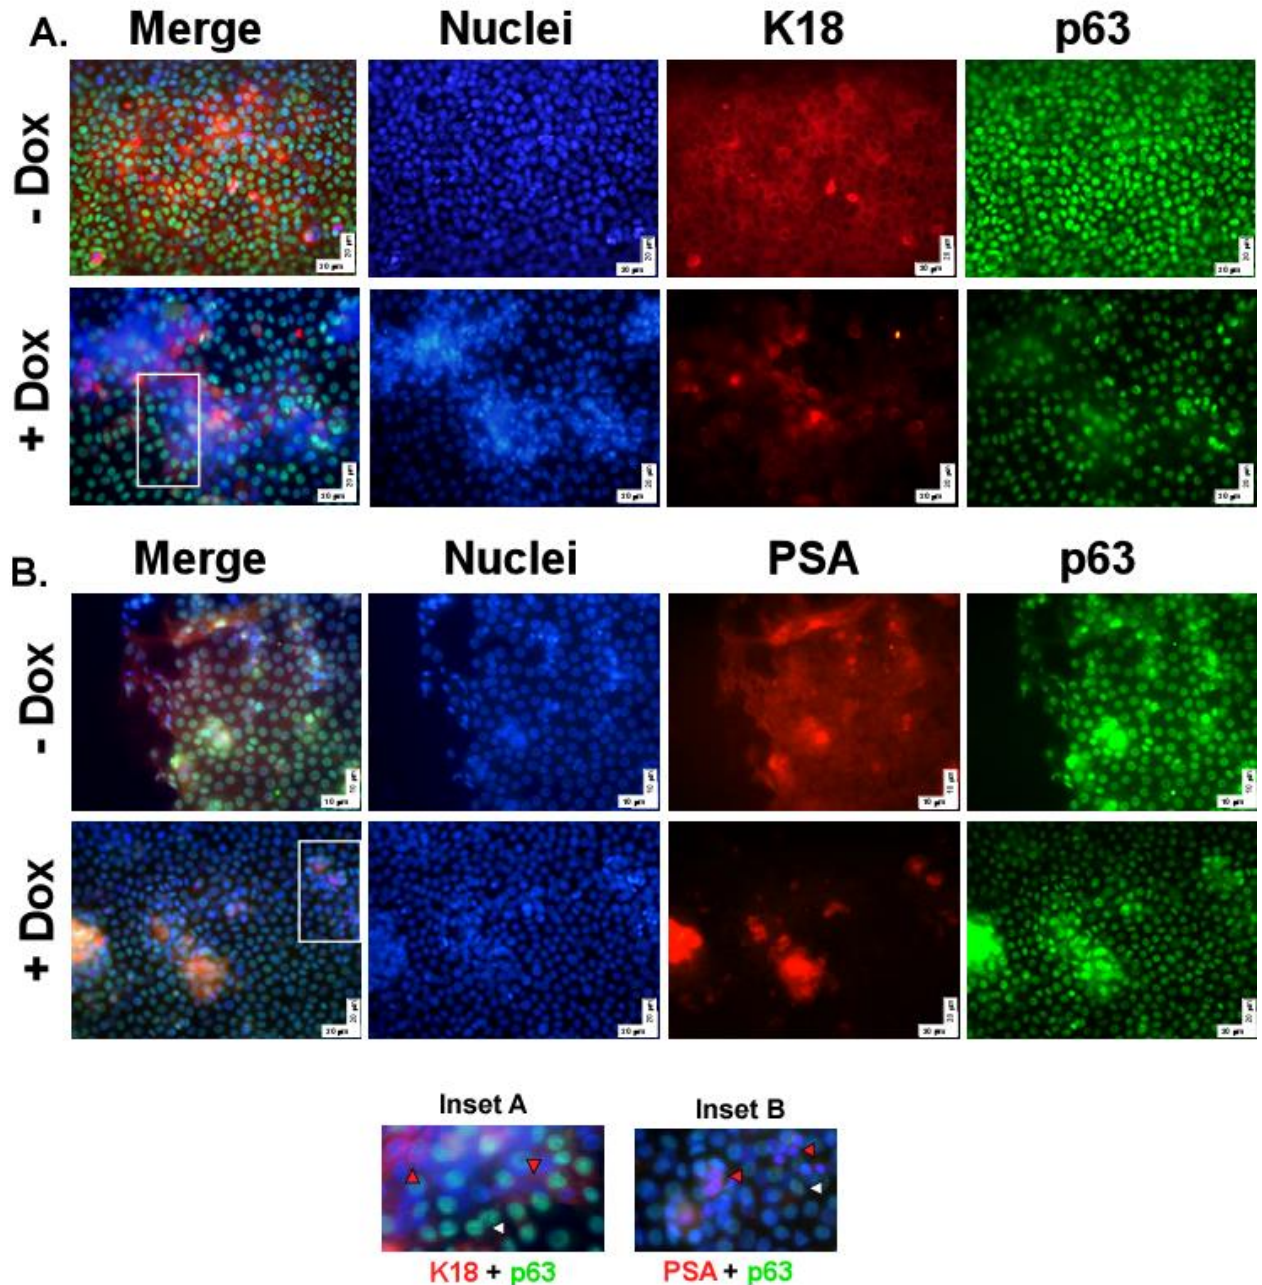

**Supplementary Figure S4:** EMP-TetON-shCREB1 cells induced to differentiate for 12 days in the absence (-Dox) or presence (+Dox) of 25ng/ml doxycycline. Cultures co-immunostained for luminal markers **A)** K18 or **B)** PSA and basal marker p63. DNA counterstained with Hoescht and imaged by fluorescence microscopy. **Insets:** Red arrows indicate **A)** K18-positive or **B)** PSA-positive luminal cells with no basal p63. White arrows indicate p63-positive basal cells with no luminal markers.

## Supplementary Figure S5

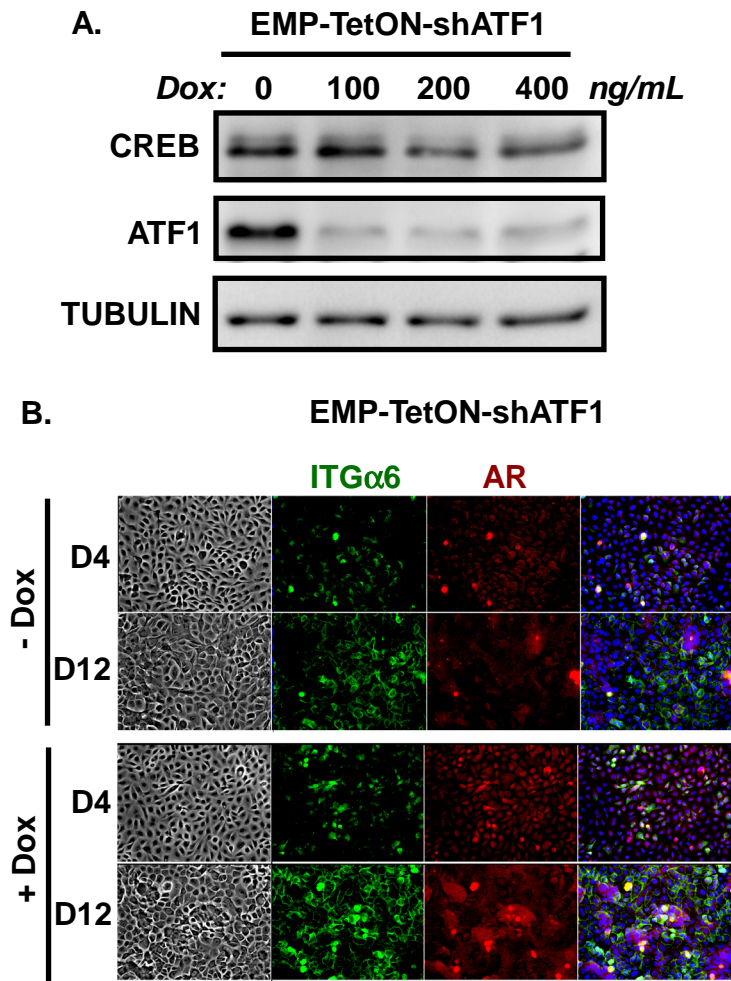

### Supplementary Figure S5: Loss of ATF1 in EMP cells does not rescue differentiation.

**A)** Titration of doxycycline in EMP-TetON-shATF1 cells. **B)** EMP-TetON-shATF1 cells were differentiated for 4 or 12 days with (+Dox) or without (-Dox) 200ng/ml doxycycline. Cultures were immunostained for integrin  $\alpha$ 6 (ITG $\alpha$ 6, basal marker), AR (luminal marker), counterstained with Hoescht (Merge), and imaged by phase or fluorescence microscopy.
