# Supplementary material
Source: PubMed Central journal article supplement (PMC10760404)
Supplement: NIHMS1688779-supplement-Supplementary_Tables_s7-S9.pdf [file NIHMS1688779-supplement-Supplementary_Tables_s7-S9.pdf]

**Table S7: shRNA Targeting Sequences**

| Gene Target |                                                                         |
|-------------|-------------------------------------------------------------------------|
| CREB #1     | 5'-CTAGACATTAGCCCAGGTATCTTGAAGTACTAGTGACATAGATACCTGGGCTAATGTTTTTTT-3'   |
| CREB #2     | 5'-CTAGACGGTGCCAACTCCAATTTACAAGTACTAGTGAGTAAATTGGAGTTGGCACCGTTTTTTT-3'  |
| ATF1        | 5'-CTAGAGTTTCAGGGAGCTCACATTTCAAGTACTAGTGAGAAATGTGAGCTCCCTGAACTTTTTTT-3' |
| PTEN        | 5'-CCGGTGGGCTTTAACTGTAGTATTTGTACTAGTCAAATACTACAGTTAAAGCCCTTTTTTTT-3'    |

**Table S8: qRT-PCR Primers**

| Gene Target | FWD Primer                    | REV Primer                      |
|-------------|-------------------------------|---------------------------------|
| CREB1       | 5'-GGCAGACAGTTCAAGTCCATG-3'   | 5'-CGCTTTTGGGAATCAGTTACAC-3'    |
| CLDN1       | 5'-ACAACCTCTTACCCAACACC-3'    | 5'-TCTCCTTTTGCCTCTGTGTC-3'      |
| TWIST       | 5'-GGACAAGCTGAGCAAGATTCAGA-3' | 5'-TCTGGAGGACCTGGTAGAGGAA-3'    |
| GATA2       | 5'-GCAACCCCTACTATGCCAAC-3'    | 5'-AGTGGCGTCTTGGAGAAGG-3'       |
| PPM1F       | 5'-ATTCAGGAAGTTGCCCAGG-3'     | 5'-CCCAAAGGCGGTTAAAGAAAC-3'     |
| Necdin      | 5'-CTAATCCCCTACTGCCCACTAC-3'  | 5'-ATCCTGAATACTATAATGACCCACC-3' |
| PLK2        | 5'-AGAACCCTTGGAACACAGAAG-3'   | 5'-GGCCTCCCTAGTAACATTGTATAC-3'  |
| BLIMP1      | 5'-GCCACATGACTTTTGCATCC-3'    | 5'-CAACAAAACACCACCCAGAC-3'      |
| CHEK1       | 5'-TGGATTGGAGTTCAAGAGACAC-3'  | 5'-CCTGGGAGACAAGAGTGAAAC-3'     |
| ING4        | 5'-TCGGAAGTTGCTTTGTTTTGC-3'   | 5'-GGTCCTCTGTTCTTTGGTCTA G-3'   |

**Table S9: ChIP Primers**

| Gene Target | FWD Primer                  | REV Primer                  |
|-------------|-----------------------------|-----------------------------|
| ING4        |                             |                             |
| CRE1        | 5'-CTGTCGCGTTACAGTCACTT-3'  | 5'-TATTTCTGCCACAGAACCG-3'   |
| ING4        |                             |                             |
| CRE2        | 5'-CCCTGCACGGATTACCATAC -3' | 5'-CCGCCCTTACTATATTACCGC-3' |
| JFK         |                             |                             |
| CRE         | 5'-CATTCCACCCTCCACAGAAC -3' | 5'-ATCTTCTCCACTCAAACGC-3'   |
| JFK TIS     | 5'-GAAGGGGGACTTTGCTGGAT-3'  | 5'-TGGATATCGCCAAGGGGAG-3'   |
| H3          | 5'-TCAGATTGTTCCCTTTCCGC -3' | 5'-AGTTGTTAATGCTGGCCACT-3'  |
